# Supplementary material
Source: PubMed Central journal article supplement (PMC6329386)
Supplement: NIHMS1000018-supplement-Appendix_1.pdf [file NIHMS1000018-supplement-Appendix_1.pdf]

cipro

| Order                                                                                                                                                                                                                                                                                                                                                                                               |
|-----------------------------------------------------------------------------------------------------------------------------------------------------------------------------------------------------------------------------------------------------------------------------------------------------------------------------------------------------------------------------------------------------|
|  <b>Ciprofloxacin Enteral - 500 mg PO q12h</b><br>Adults - ID Approval Required unless part of an orderset<br>Pediatrics - ID Approval Required in JHH Pediatrics<br>DOM HVCC recommends against treating asymptomatic bacteriuria/pyuria. Cystitis symptoms include frequency; urgency; dysuria; suprapubic pain. |
|  <b>Ciprofloxacin Enteral - 750 mg PO q12h</b>                                                                                                                                                                                                                                                                     |

Appendix Figure 1
