# Supplementary material
Source: PubMed Central journal article supplement (PMC6329386)
Supplement: NIHMS1000018-supplement-Appendix_2.pdf [file NIHMS1000018-supplement-Appendix_2.pdf]

# Attention Prescribers

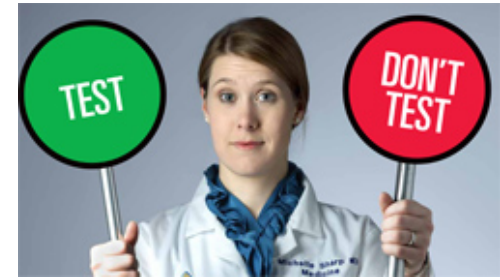

Positive Urine Culture  $\neq$  UTI

**DON'T** routinely send **urine cultures** in your asymptomatic adult patients

- Asymptomatic bacteriuria is more common than UTI and does not need to be treated in most cases!

# Attention Prescribers



## UTI:

- Symptoms
- Bacteriuria
- Pyuria

**DON'T** send **urine cultures** in  
your asymptomatic adult  
patients

Asymptomatic bacteriuria is more  
common than UTI and does not need  
to be treated in most cases!
